# Supplementary material for: Synthesis and Inhibition Activity Study of Triazinyl-Substituted Amino(alkyl)-benzenesulfonamide Conjugates with Polar and Hydrophobic Amino Acids as Inhibitors of Human Carbonic Anhydrases I, II, IV, IX, and XII
Source: MDPI journal article supplement (doi:10.3390/ijms222011283), 2021-10-19
Supplement: s1 [file s1]

Supplementary Material for:

# Synthesis and Inhibition Activity Study of Triazinyl-Substituted Amino(alkyl)-Benzenesulfonamide Conjugates with Polar and Hydrophobic Amino Acids as Inhibitors of Human Carbonic Anhydrases I, II, IV, IX, and XII

Mária Bodnár Mikulová <sup>1</sup>, Dáša Kružlicová <sup>1</sup>, Daniel Pecher <sup>1,2</sup>, Andrea Petreni <sup>3</sup>, Claudiu T. Supuran <sup>3</sup> and Peter Mikuš <sup>1,2,\*</sup>

<sup>1</sup> Department of Pharmaceutical Analysis and Nuclear Pharmacy, Faculty of Pharmacy, Comenius University in Bratislava, Odbojárov 10, 832 32 Bratislava, Slovakia; mikulova43@uniba.sk (M.B.M.); pecher1@uniba.sk (D.P.); kruzlicova@fpharm.uniba.sk (D.K.)

<sup>2</sup> Toxicological and Antidoping Center, Faculty of Pharmacy, Comenius University in Bratislava, Odbojárov 10, 832 32 Bratislava, Slovakia

<sup>3</sup> Neurofarba Department, Section of Pharmaceutical and Nutriceutical Sciences, University of Florence, 50139 Florence, Italy; andrea.petreni@unifi.it (A.P.); claudiu.supuran@unifi.it (C.T.S.).

\* Correspondence: mikus@fpharm.uniba.sk (P.M.); Tel.: +421-250117243; ORCID 0000-0001-5755-9970

**S1.** 2,2'-[(6-((4-sulfamoylbenzyl)amino)-1,3,5-triazine-2,4-diyl)diimino]dipropanoic acid **11** and its IR (a),  $^1\text{H}$  (b),  $^{13}\text{C}$  (c) NMR and LC-DAD/MS (d) spectra

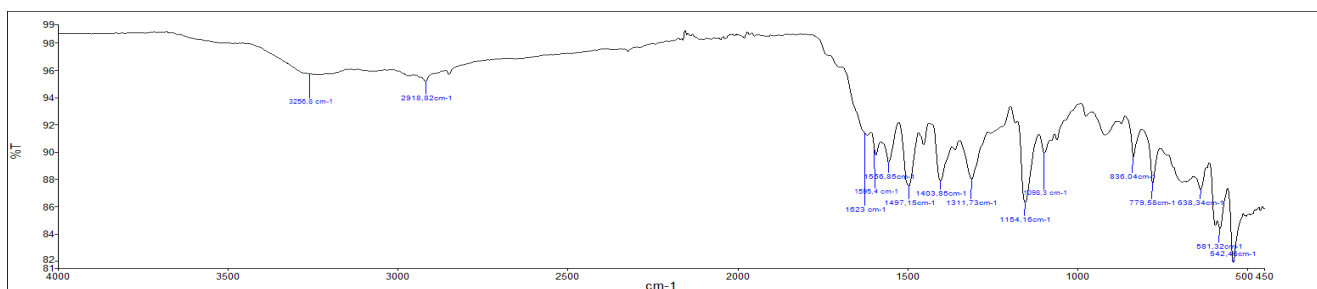

**Figure S1a.** IR spectra of product **11**.

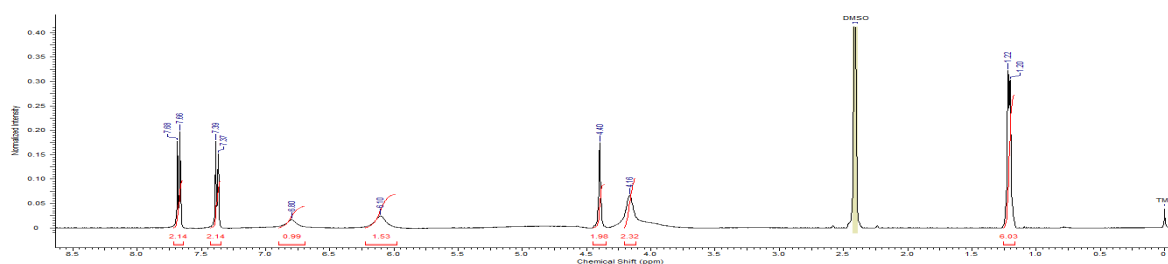

**Figure S1b.**  $^1\text{H}$  NMR spectra of product **11**.

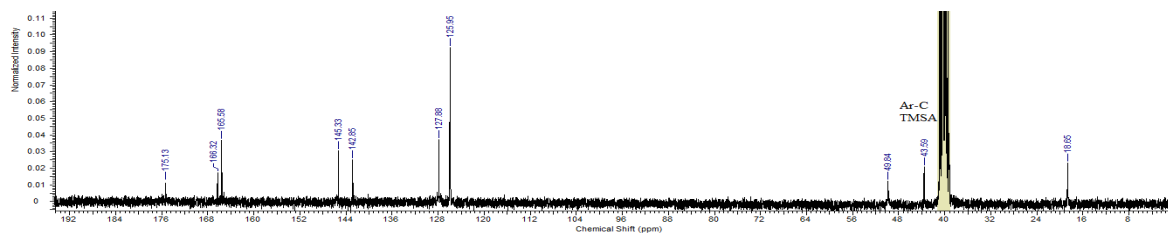

**Figure S1c.**  $^{13}\text{C}$  NMR spectra of product **11**.

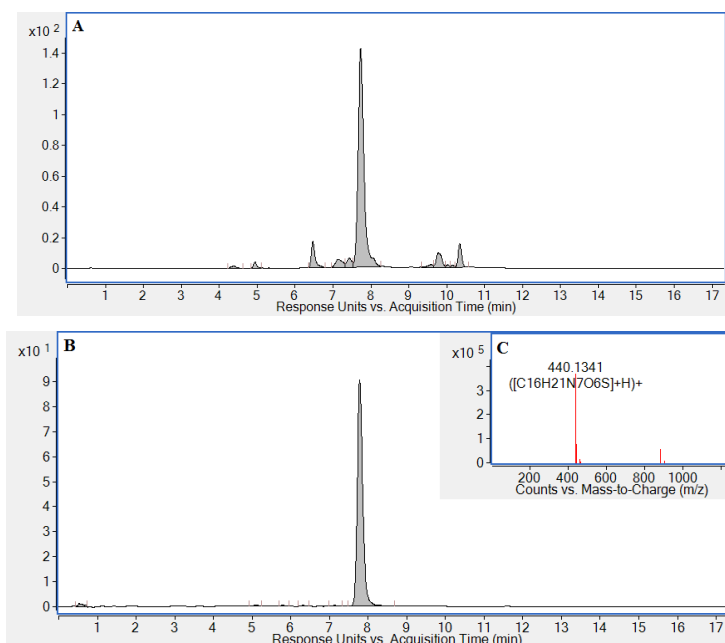

**Figure S1d.** HILIC-DAD-QTOF analysis of product **11**. Purity profile (HILIC-DAD - 254 nm) before (panel A) and after (panel B) semi-preparative chromatography. Panel C – MS spectrum of the desired compound (the major peak from UV chromatogram).

**S2.** 2,2'-[(6-((4-sulfamoylbenzyl)amino)-1,3,5-triazine-2,4-diyl)diimino]bis(3-(4-hydroxyphenyl)propanoic acid) **12** and its IR (a),  $^1\text{H}$  (b),  $^{13}\text{C}$  (c) NMR and DAD/MS (d) spectra

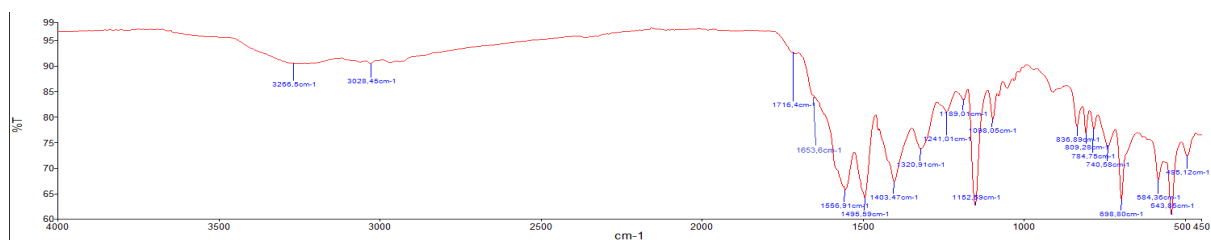

**Figure S2a.** IR spectra of product **12**.

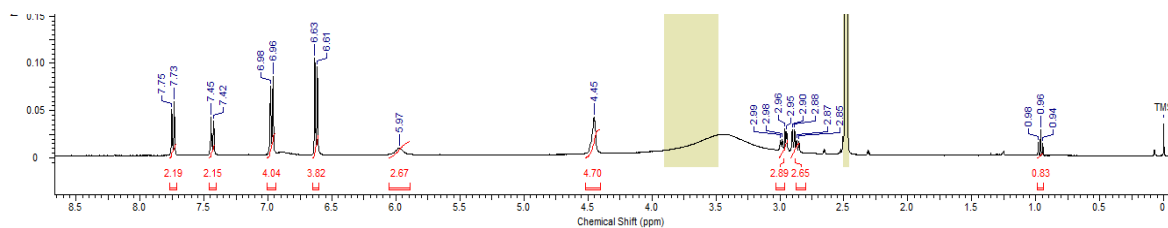

**Figure S2b.**  $^1\text{H}$  NMR spectra of product **12**.

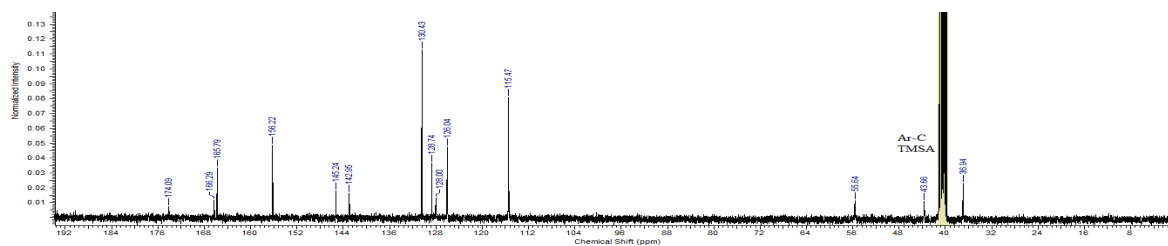

**Figure S2c.**  $^{13}\text{C}$  NMR spectra of product **12**.

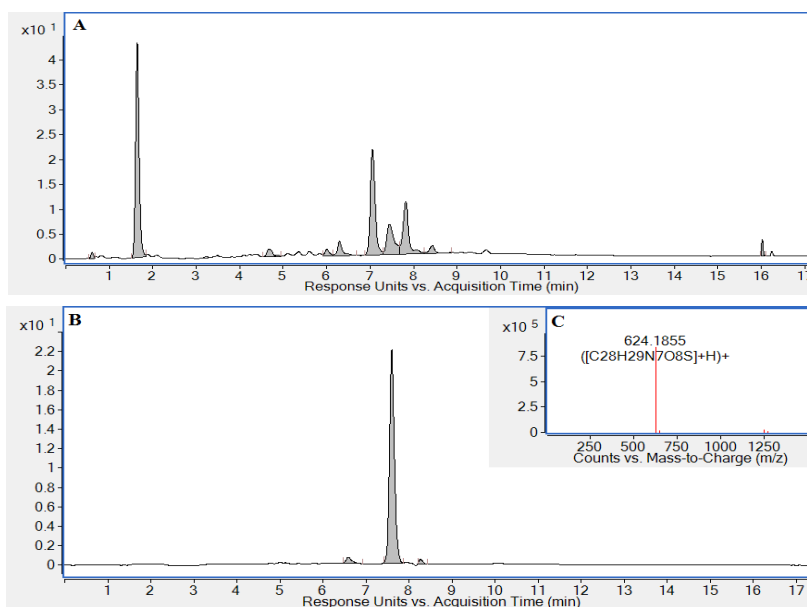

**Figure S2d.** HILIC-DAD-QTOF analysis of product **12**. Purity profile (HILIC-DAD - 254 nm) before (panel A) and after (panel B) semi-preparative chromatography. Panel C – MS spectrum of the desired compound (the major peak from UV chromatogram).

**S3.** 2,2'-[(6-((4-sulfamoylbenzyl)amino)-1,3,5-triazine-2,4-diyl)diimino]bis(3-(1*H*-indol-3-yl)propanoic acid) **13** and its IR (a), <sup>1</sup>H (b), <sup>13</sup>C (c) NMR and DAD/MS (d) spectra

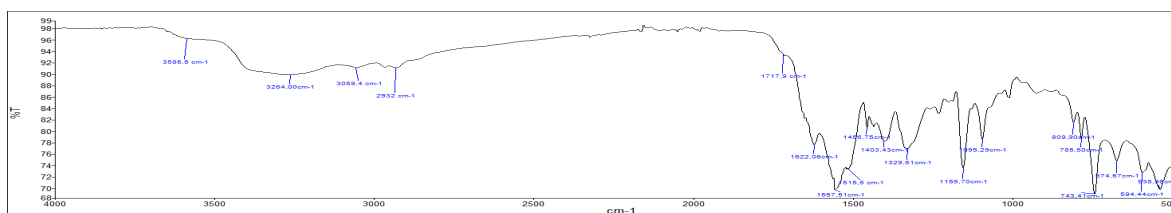

**Figure S3a.** IR spectra of product **13**.

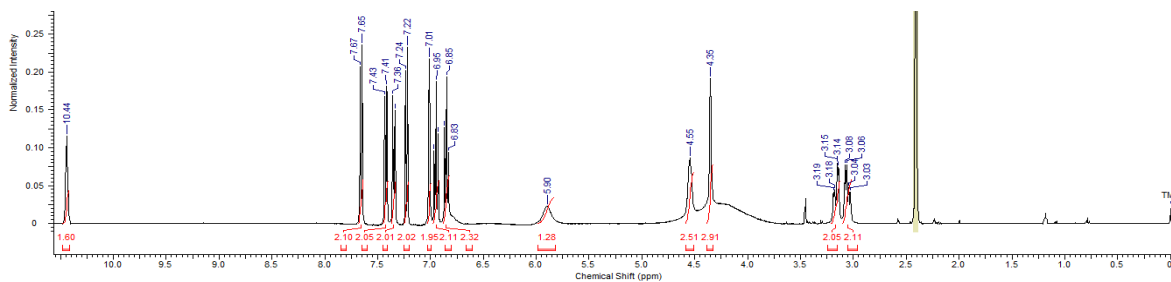

**Figure S3b.** <sup>1</sup>H NMR spectra of product **13**.

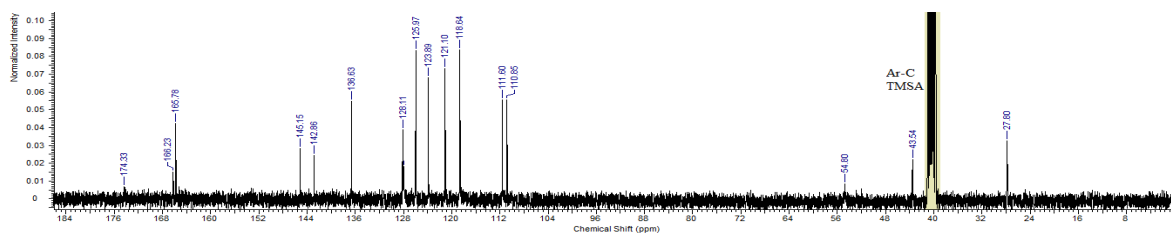

**Figure S3c.** <sup>13</sup>C NMR spectra of product **13**.

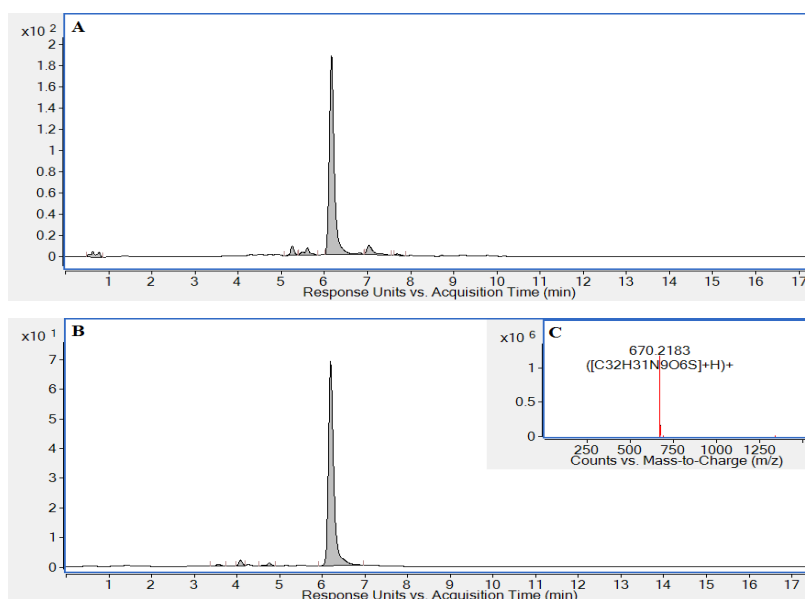

**Figure S3d.** HILIC-DAD-QTOF analysis of product **13**. Purity profile (HILIC-DAD - 254 nm) before (panel A) and after (panel B) semi-preparative chromatography. Panel C – MS spectrum of the desired compound (the major peak from UV chromatogram).

**S4.** 2,2'-[(6-((4-sulfamoylbenzyl)amino)-1,3,5-triazine-2,4-diyl)diimino]bis(3-hydroxypropanoic acid) **14** and its IR (a),  $^1\text{H}$  (b),  $^{13}\text{C}$  (c) NMR and DAD/MS (d) spectra

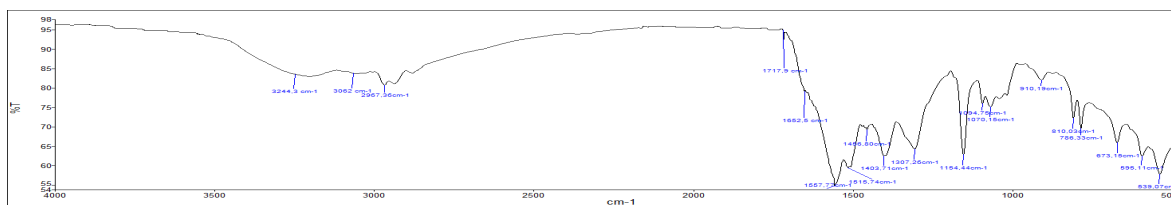

**Figure S4a.** IR spectra of product **14**.

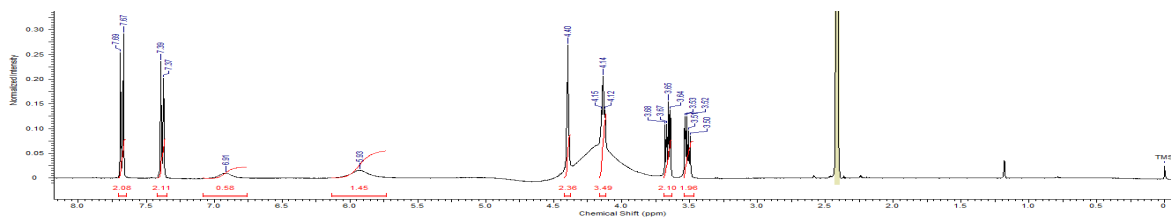

**Figure S4b.**  $^1\text{H}$  NMR spectra of product **14**.

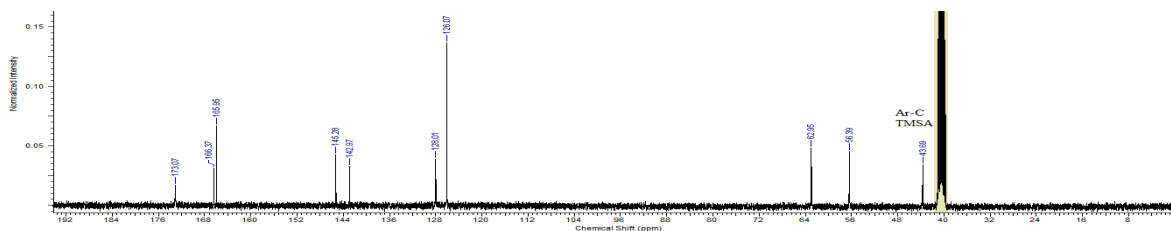

**Figure S4c.**  $^{13}\text{C}$  NMR spectra of product **14**.

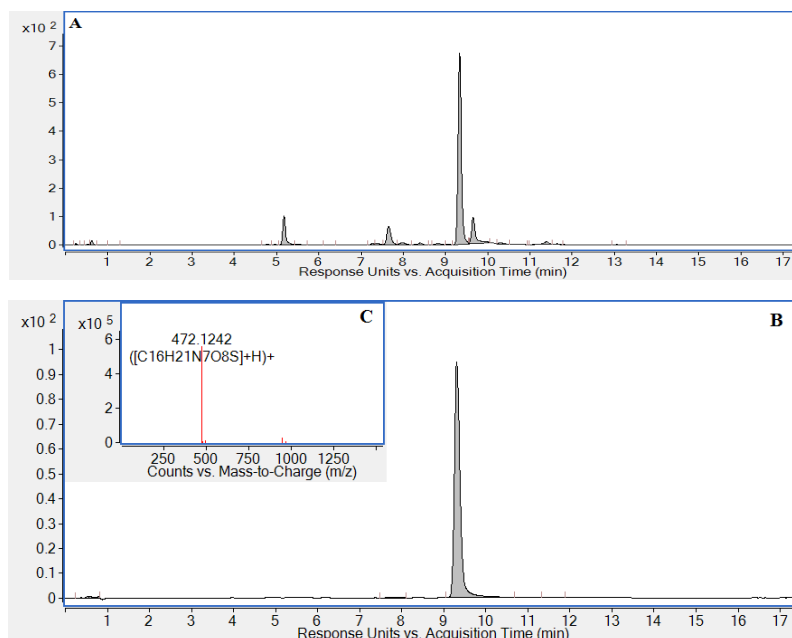

**Figure S4d.** HILIC-DAD-QTOF analysis of product **14**. Purity profile (HILIC-DAD - 254 nm) before (panel A) and after (panel B) semi-preparative chromatography. Panel C – MS spectrum of the desired compound (the major peak from UV chromatogram).



**S6.** 2,2'-[(6-((4-sulfamoylbenzyl)amino)-1,3,5-triazine-2,4-diyl)diimino]bis(3-carbamoylpropanoic acid) **16** and its IR (a),  $^1\text{H}$  (b),  $^{13}\text{C}$  (c) NMR and DAD/MS (d) spectra.

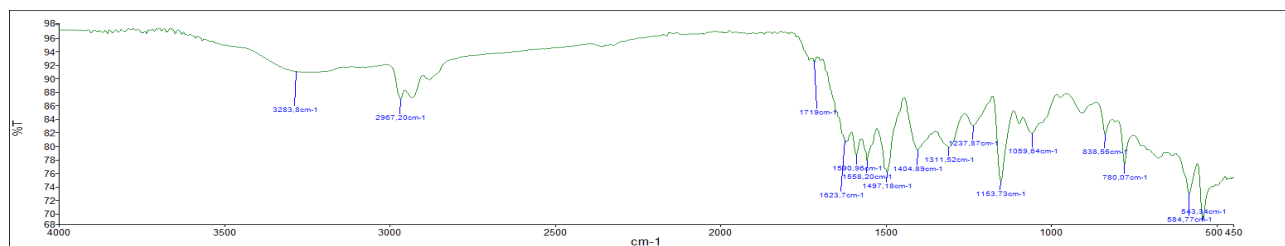

**Figure S6a.** IR spectra of product **16**.

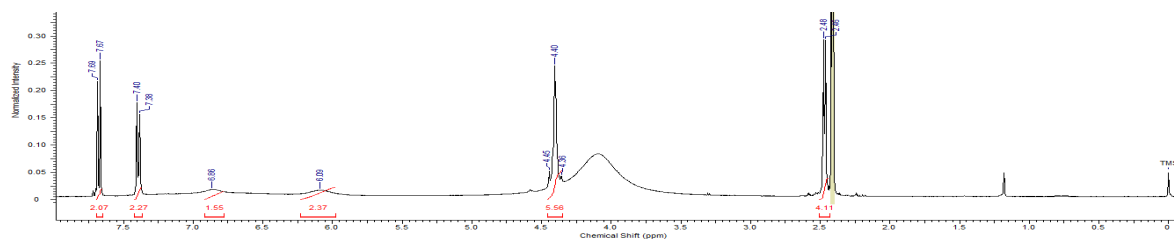

**Figure S6b.**  $^1\text{H}$  NMR spectra of product **16**.

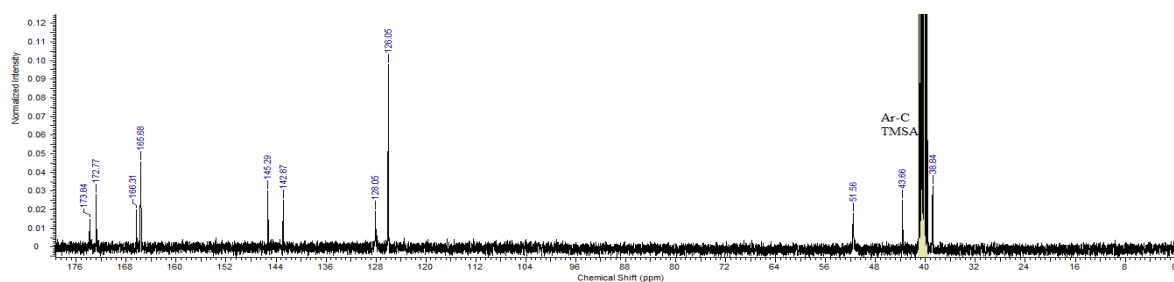

**Figure S6c.**  $^{13}\text{C}$  NMR spectra of product **16**.

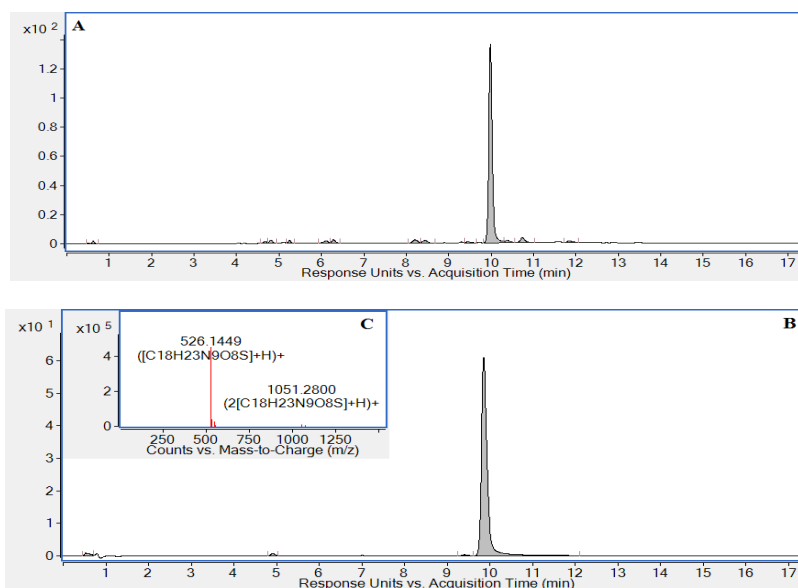

**Figure S6d.** HILIC-DAD-QTOF analysis of product **16**. Purity profile (HILIC-DAD - 254 nm) before (panel A) and after (panel B) semi-preparative chromatography. Panel C – MS spectrum of the desired compound (the major peak from UV chromatogram).

**S7.** 2,2'-[(6-((4-sulfamoylbenzyl)amino)-1,3,5-triazine-2,4-diyl)diimino]bis(4-carbamoylbutanoic acid) **17** and its IR (a),  $^1\text{H}$  (b),  $^{13}\text{C}$  (c) NMR and DAD/MS (d) spectra

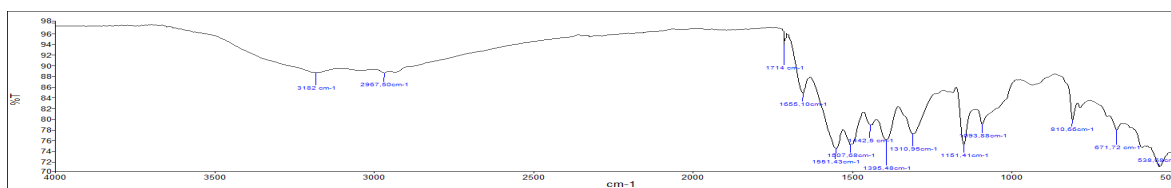

**Figure S7a.** IR spectra of product **17**.

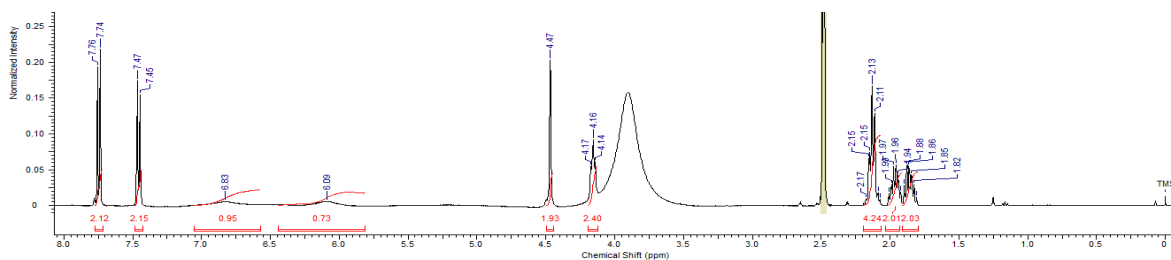

**Figure S7b.**  $^1\text{H}$  NMR spectra of product **17**.

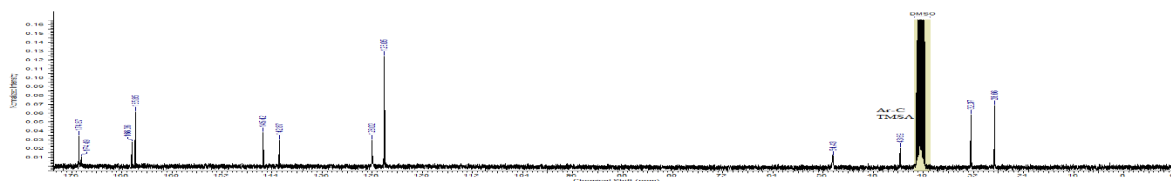

**Figure S7c.**  $^{13}\text{C}$  NMR spectra of product **17**.

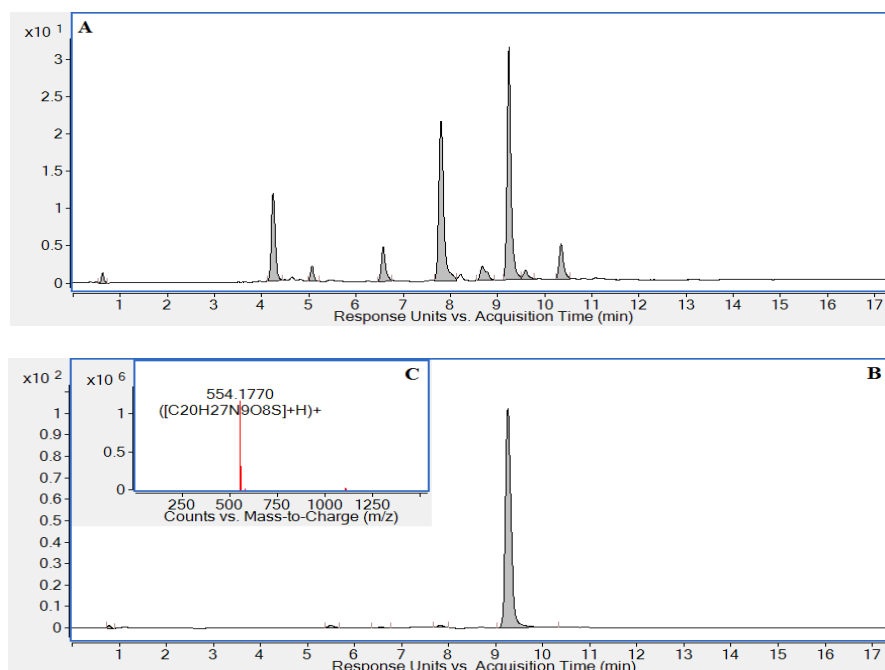

**Figure S7d.** HILIC-DAD-QTOF analysis of product **17**. Purity profile (HILIC-DAD - 254 nm) before (panel A) and after (panel B) semi-preparative chromatography. Panel C – MS spectrum of the desired compound (the major peak from UV chromatogram).



**S8.** 2,2'-[(6-((2-(4-sulfamoylphenyl)ethyl)amino)-1,3,5-triazine-2,4-diyl)diimino]dipropanoic acid **18** and its IR (a),  $^1\text{H}$  (b),  $^{13}\text{C}$  (c) NMR and DAD/MS (d) spectra

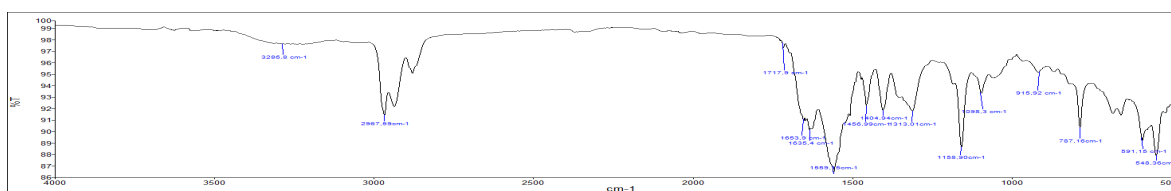

**Figure S8a.** IR spectra of product **18**.

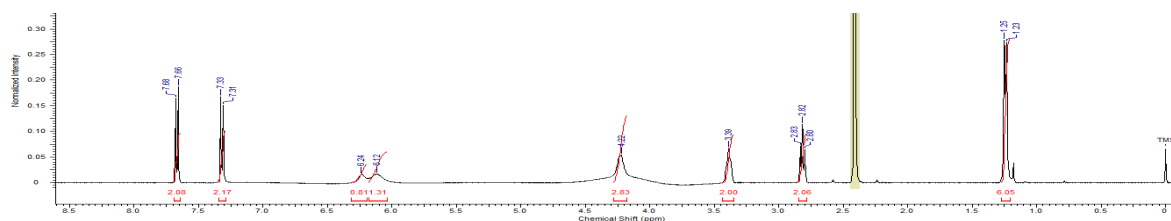

**Figure S8b.**  $^1\text{H}$  NMR spectra of product **18**.

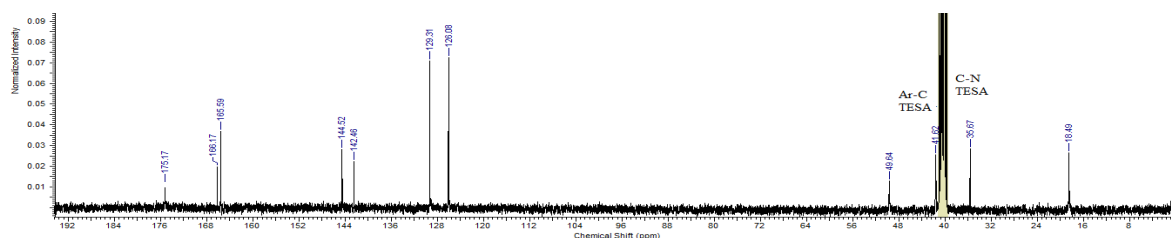

**Figure S8c.**  $^{13}\text{C}$  NMR spectra of product **18**.

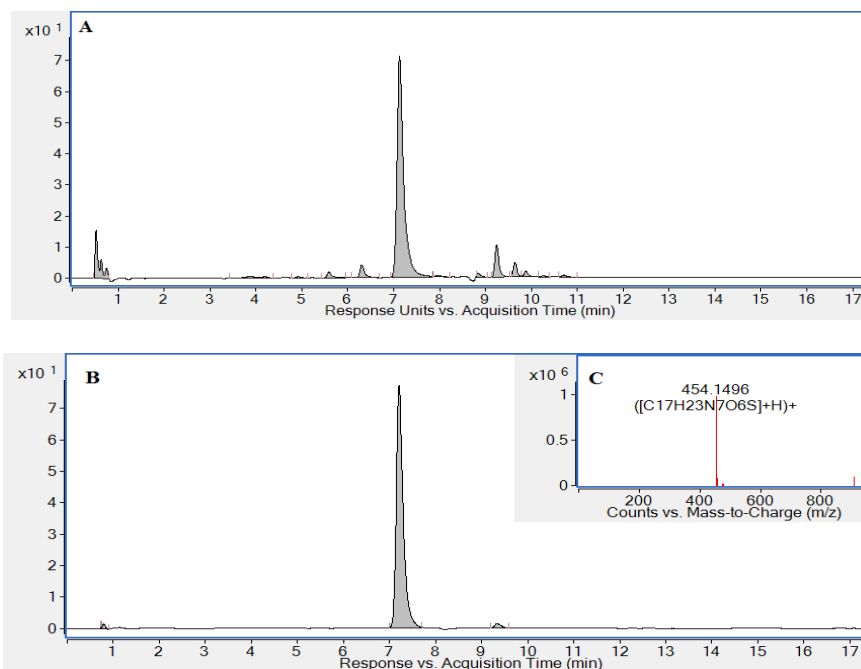

**Figure S8d.** HILIC-DAD-QTOF analysis of product **18**. Purity profile (HILIC-DAD - 254 nm) before (panel A) and after (panel B) semi-preparative chromatography. Panel C – MS spectrum of the desired compound (the major peak from UV chromatogram).

**S9.** 2,2'-[(6-((2-(4-sulfamoylphenyl)ethyl)amino)-1,3,5-triazine-2,4-diyl)diimino]bis(3-(4-hydroxyphenyl)propanoic acid) **19** and its IR (a), <sup>1</sup>H (b), <sup>13</sup>C (c) NMR and DAD/MS (d) spectra.

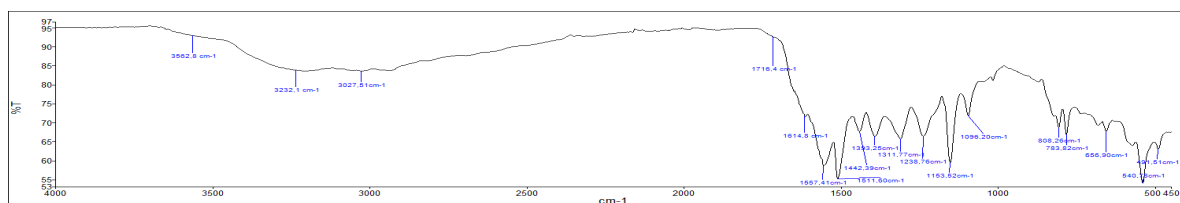

**Figure S9a.** IR spectra of product **19**.

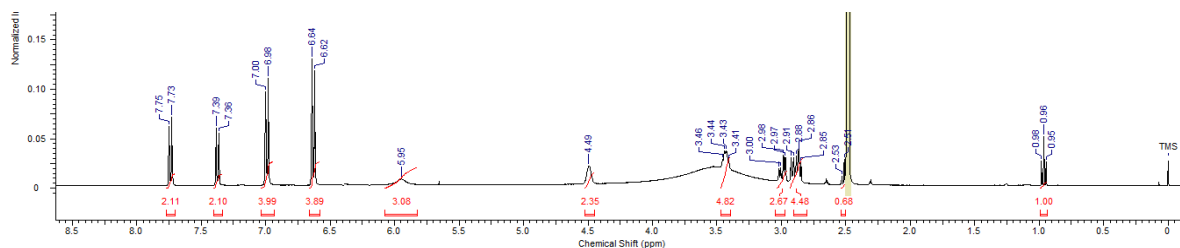

**Figure S9b.** <sup>1</sup>H NMR spectra of product **19**.

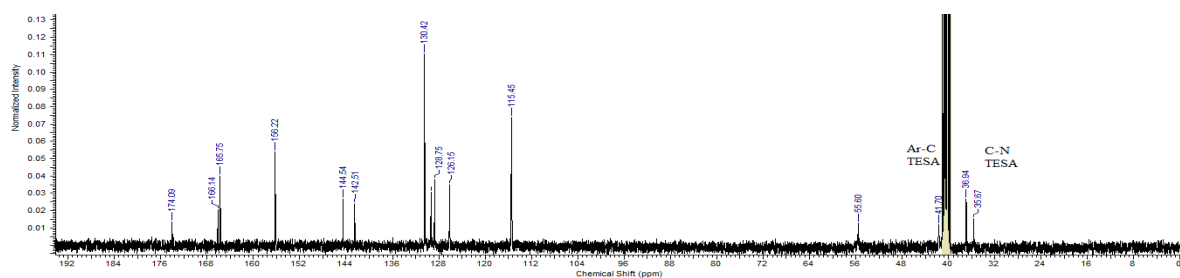

**Figure S9c.** <sup>13</sup>C NMR spectra of product **19**.

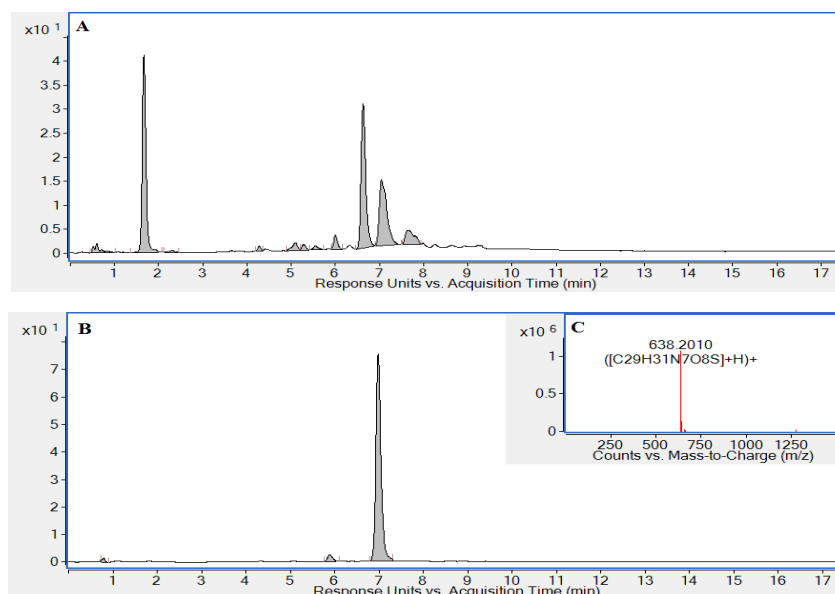

**Figure S9d.** HILIC-DAD-QTOF analysis of product **19**. Purity profile (HILIC-DAD - 254 nm) before (panel A) and after (panel B) semi-preparative chromatography. Panel C – MS spectrum of the desired compound (the major peak from UV chromatogram).

**S10.** 2,2'-[(6-(2-(4-sulfamoylphenyl)ethyl)amino)-1,3,5-triazine-2,4-diyl]diimino]bis(3-(1*H*-indol-3-yl)propanoic acid) **20** and its IR (a), <sup>1</sup>H (b), <sup>13</sup>C (c) NMR and DAD/MS (d) spectra

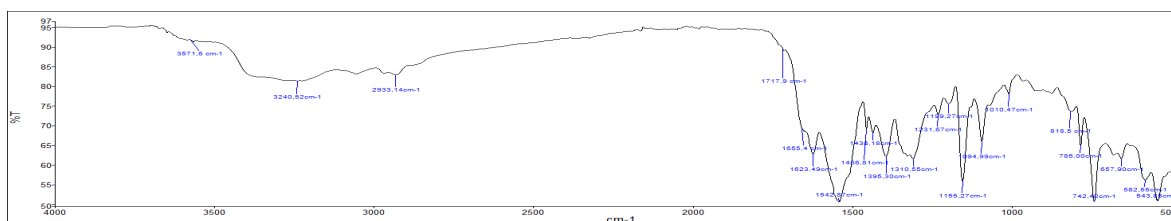

**Figure S10a.** IR spectra of product **20**.

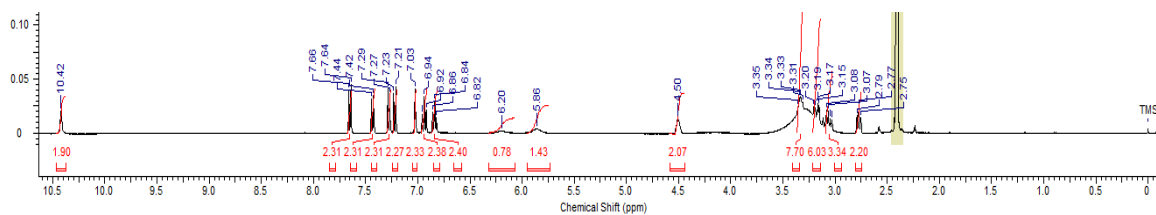

**Figure S10b.** <sup>1</sup>H NMR spectra of product **20**.

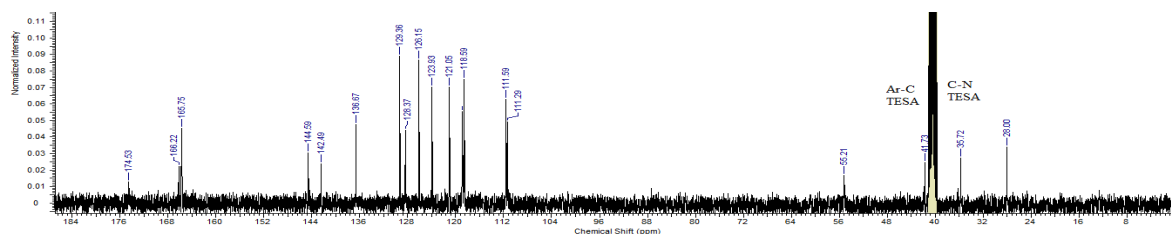

**Figure S10c.** <sup>13</sup>C NMR spectra of product **20**.

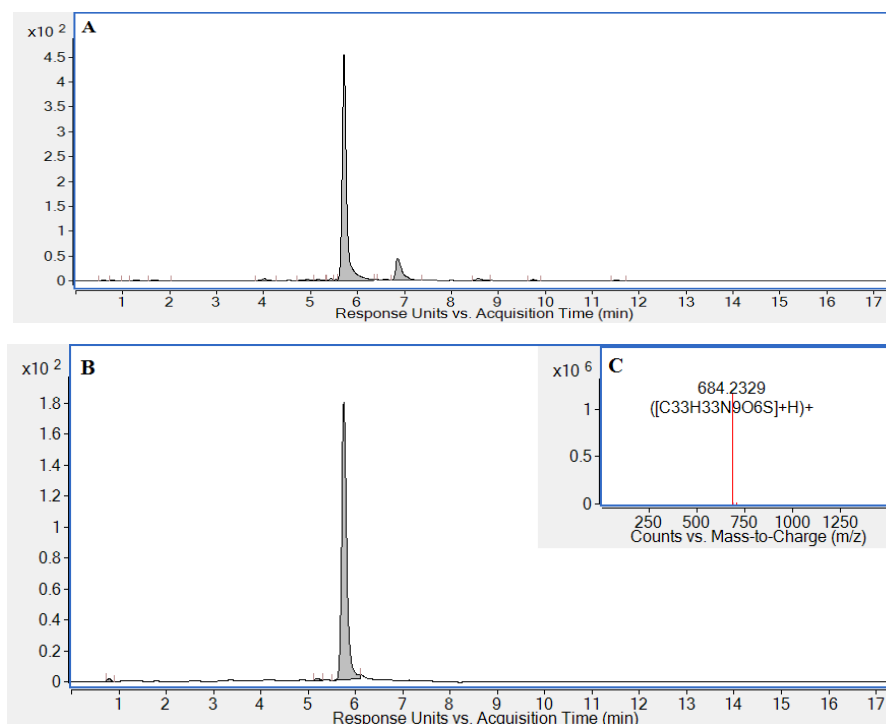

**Figure S10d.** HILIC-DAD-QTOF analysis of product **20**. Purity profile (HILIC-DAD - 254 nm) before (panel A) and after (panel B) semi-preparative chromatography. Panel C – MS spectrum of the desired compound (the major peak from UV chromatogram).

**S11.** 2,2'-[(6-((2-(4-sulfamoylphenyl)ethyl)amino)-1,3,5-triazine-2,4-diyl)diimino]bis(3-hydroxypropanoic acid) **21** and its IR (a),  $^1\text{H}$  (b),  $^{13}\text{C}$  (c) NMR and DAD/MS (d) spectra

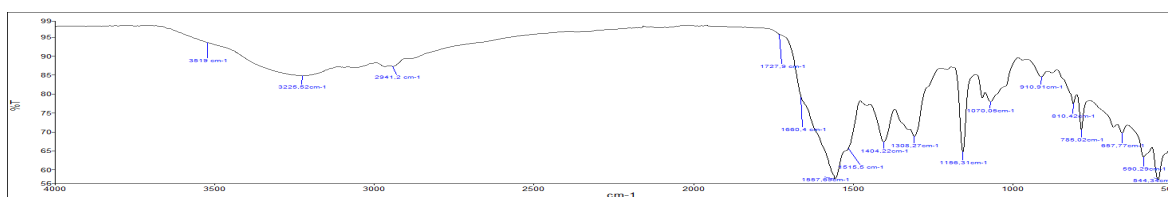

**Figure S11a.** IR spectra of product **21**.

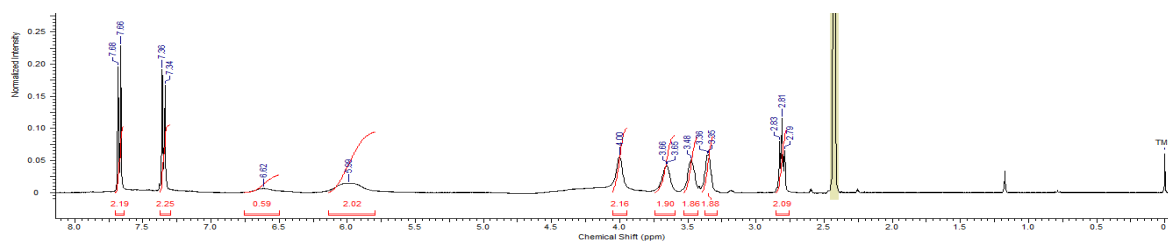

**Figure S11b.**  $^1\text{H}$  NMR spectra of product **21**.

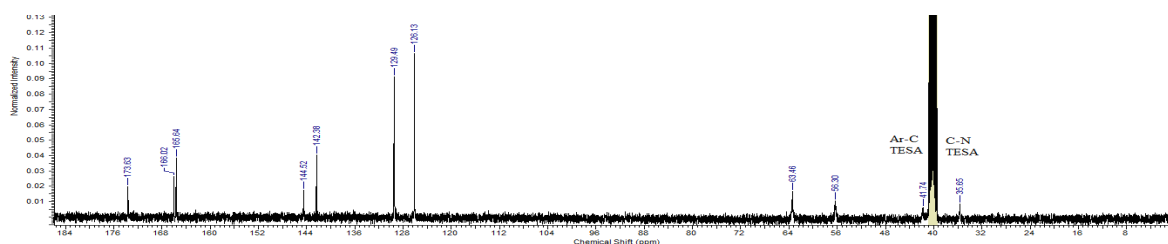

**Figure S11c.**  $^{13}\text{C}$  NMR spectra of product **21**.

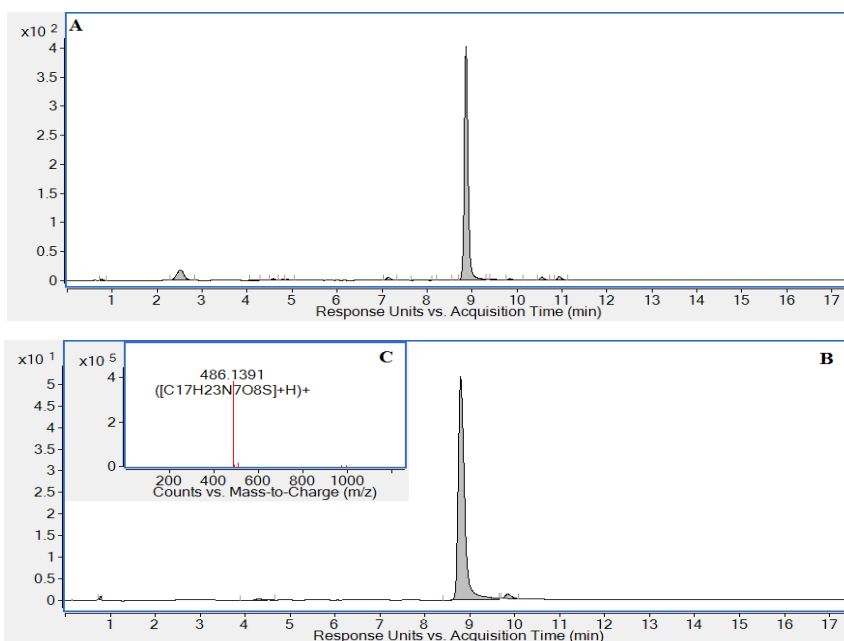

**Figure S11d.** HILIC-DAD-QTOF analysis of product **21**. Purity profile (HILIC-DAD - 254 nm) before (panel A) and after (panel B) semi-preparative chromatography. Panel C – MS spectrum of the desired compound (the major peak from UV chromatogram).



**S13.** 2,2'-[((6-((2-(4-sulfamoylphenyl)ethyl)amino)-1,3,5-triazine-2,4-diyl)diimino]bis(3-carbamoylpropanoic acid) **23** and its IR (a),  $^1\text{H}$  (b),  $^{13}\text{C}$  (c) NMR and DAD/MS (d) spectra

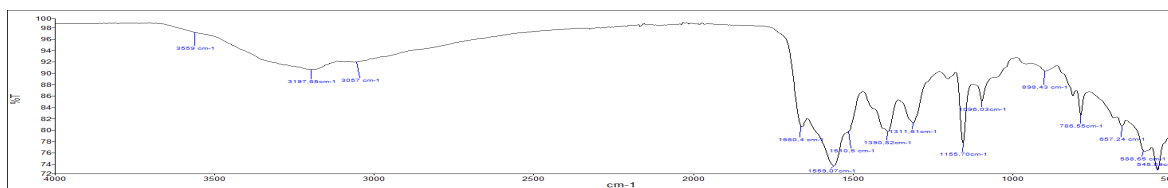

**Figure S13a.** IR spectra of product **23**.

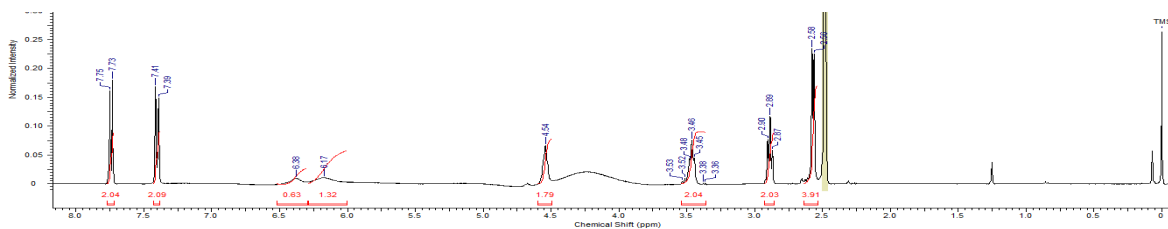

**Figure S13b.**  $^1\text{H}$  NMR spectra of product **23**.

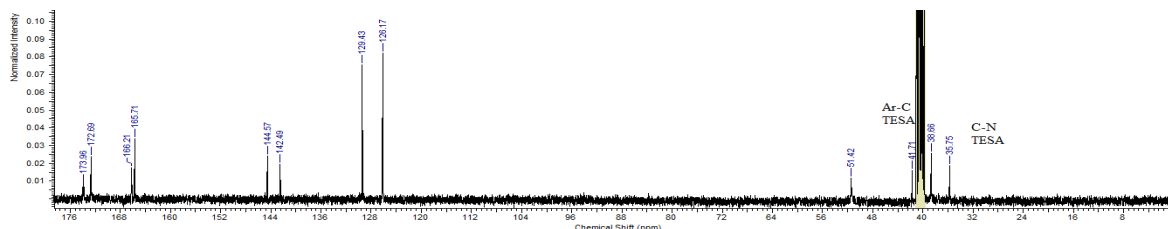

**Figure S13c.**  $^{13}\text{C}$  NMR spectra of product **23**.

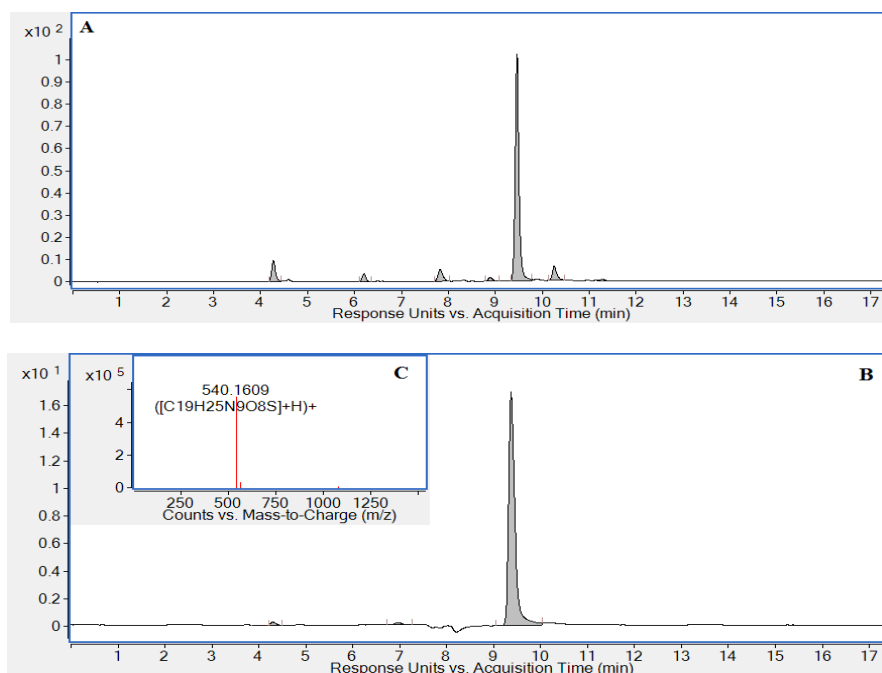

**Figure S13d.** HILIC-DAD-QTOF analysis of product **23**. Purity profile (HILIC-DAD - 254 nm) before (panel A) and after (panel B) semi-preparative chromatography. Panel C – MS spectrum of the desired compound (the major peak from UV chromatogram).

**S14.** 2,2'-[(6-((2-(4-sulfamoylphenyl)ethyl)amino)-1,3,5-triazine-2,4-diyl)diimino]bis(4-carbamoylbutanoic acid) **24** and its IR (a),  $^1\text{H}$  (b),  $^{13}\text{C}$  (c) NMR and DAD/MS (d) spectra

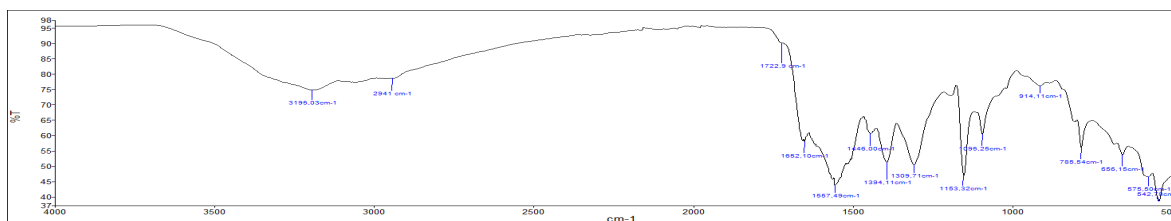

**Figure S14a.** IR spectra of product **24**.

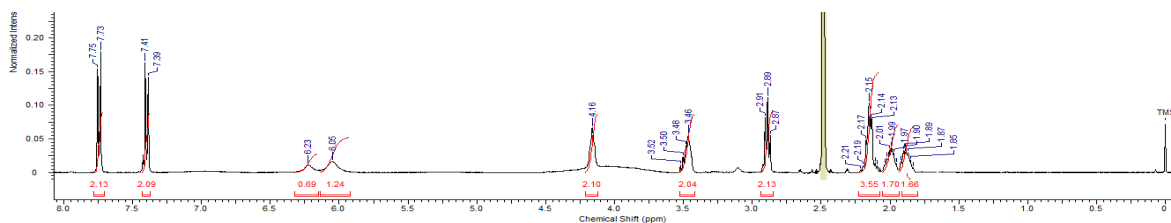

**Figure S14b.**  $^1\text{H}$  NMR spectra of product **24**.

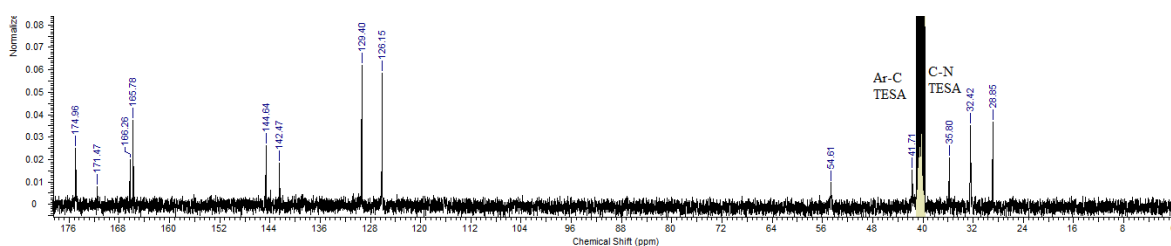

**Figure S14c.**  $^{13}\text{C}$  NMR spectra of product **24**.

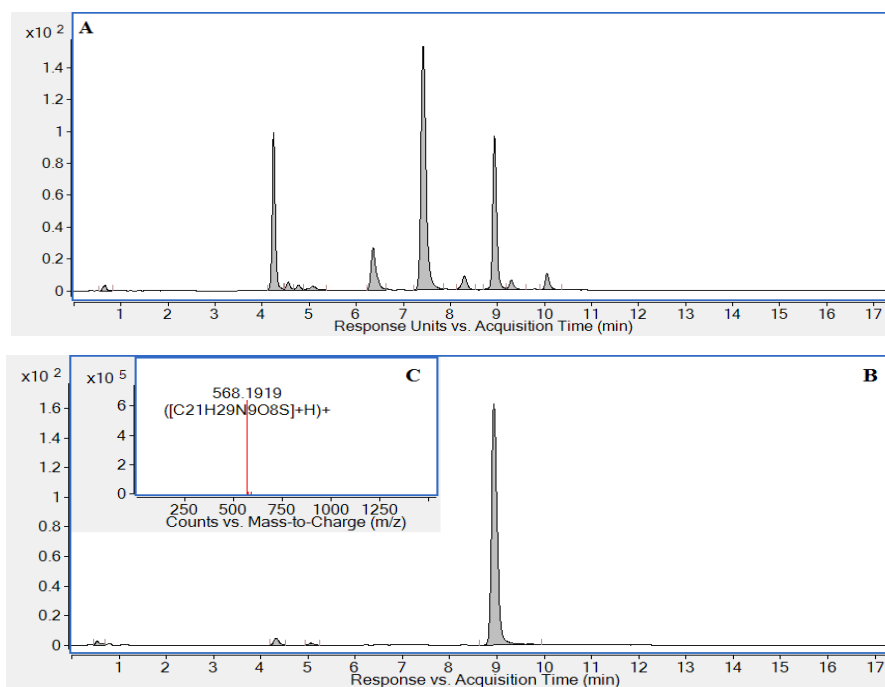

**Figure S14d.** HILIC-DAD-QTOF analysis of product **24**. Purity profile (HILIC-DAD - 254 nm) before (panel A) and after (panel B) semi-preparative chromatography. Panel C – MS spectrum of the desired compound (the major peak from UV chromatogram).
